# Supplementary material for: Using Pareto optimality to explore the topology and dynamics of the human connectome
Source: PubMed Central journal article supplement (PMC4150305; doi:10.1098/rstb.2013.0530), 2014-10-05

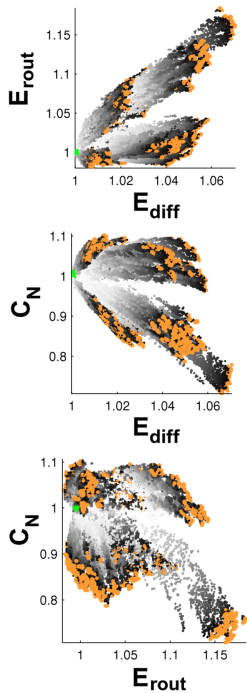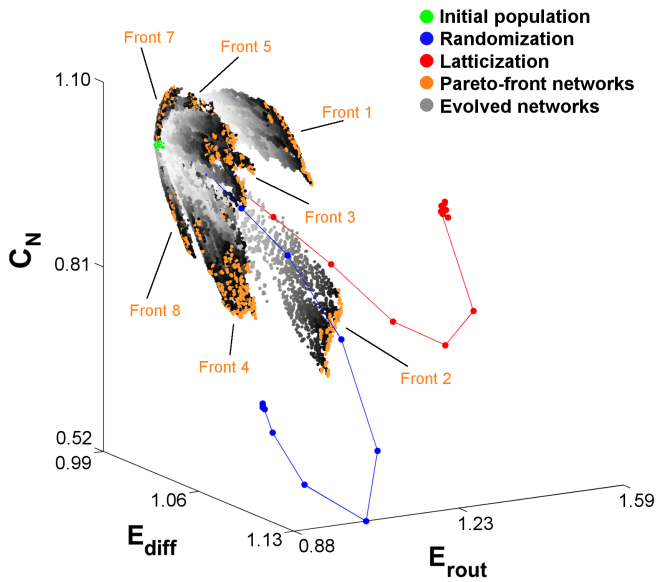

Supplement: rstb20130530supp2.pdf [file rstb20130530supp2.pdf]
